# Supplementary material for: Synthesis of hierarchical Bi2S3nanoflowers via a topotactic transformation from hierarchical Bi2WO6nanoflowers and their supercapacitor performance
Source: Royal Society of Chemistry journal article supplement (doi:10.1039/c6ce02410f), 2016-12-06
Supplement: c6ce02410f1.pdf [file c6ce02410f1.pdf]

Electronic Supplementary Information for

## Synthesis of hierarchal $\text{Bi}_2\text{S}_3$ nanoflowers via a topotactic transformation from hierarchal $\text{Bi}_2\text{WO}_6$ nanoflowers and their supercapacitor performance

K. L. Liu,<sup>a,c</sup> F. Chen,<sup>a</sup> Y. Liu,<sup>a</sup> D. Li<sup>b,\*</sup> and W. D. Shi<sup>a,\*</sup>

<sup>a</sup> School of Chemistry and Chemical Engineering, Jiangsu University, Zhenjiang, Jiangsu, China.

<sup>b</sup> Institute for Energy Research, Jiangsu University, Zhenjiang, Jiangsu, China.

<sup>c</sup> Department of Physics, Zhoukou Normal University, Zhoukou, Henan, China.

### FIGURE

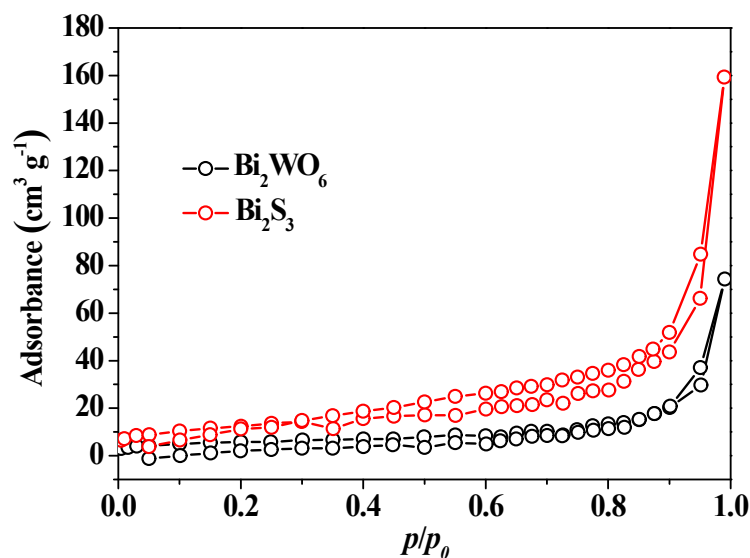

Fig. S1 Adsorption-desorption isotherms of both  $\text{Bi}_2\text{S}_3$  and  $\text{Bi}_2\text{WO}_6$ .

The  $\text{N}_2$  adsorption-desorption isotherm for both  $\text{Bi}_2\text{S}_3$  and  $\text{Bi}_2\text{WO}_6$  are characteristic of a type IV isotherm with a type H1 hysteresis loop according to Brunauer-Deming-Deming-Teller (BDDT) classification, and the BET surfaces area of  $\text{Bi}_2\text{S}_3$  and  $\text{Bi}_2\text{WO}_6$  are  $20.0 \text{ m}^2 \text{ g}^{-1}$  and  $45.4 \text{ m}^2 \text{ g}^{-1}$ , respectively.
